# Supplementary material for: Feasibility of artificial reefs as coastal protection measures at the Danube Delta coast, Romania
Source: Frontiers journal article supplement (doi:10.3389/fenvs.2025.1568364), 2025-04-03
Supplement: Supplementary_file_7.pdf [file Supplementary_file_7.pdf]

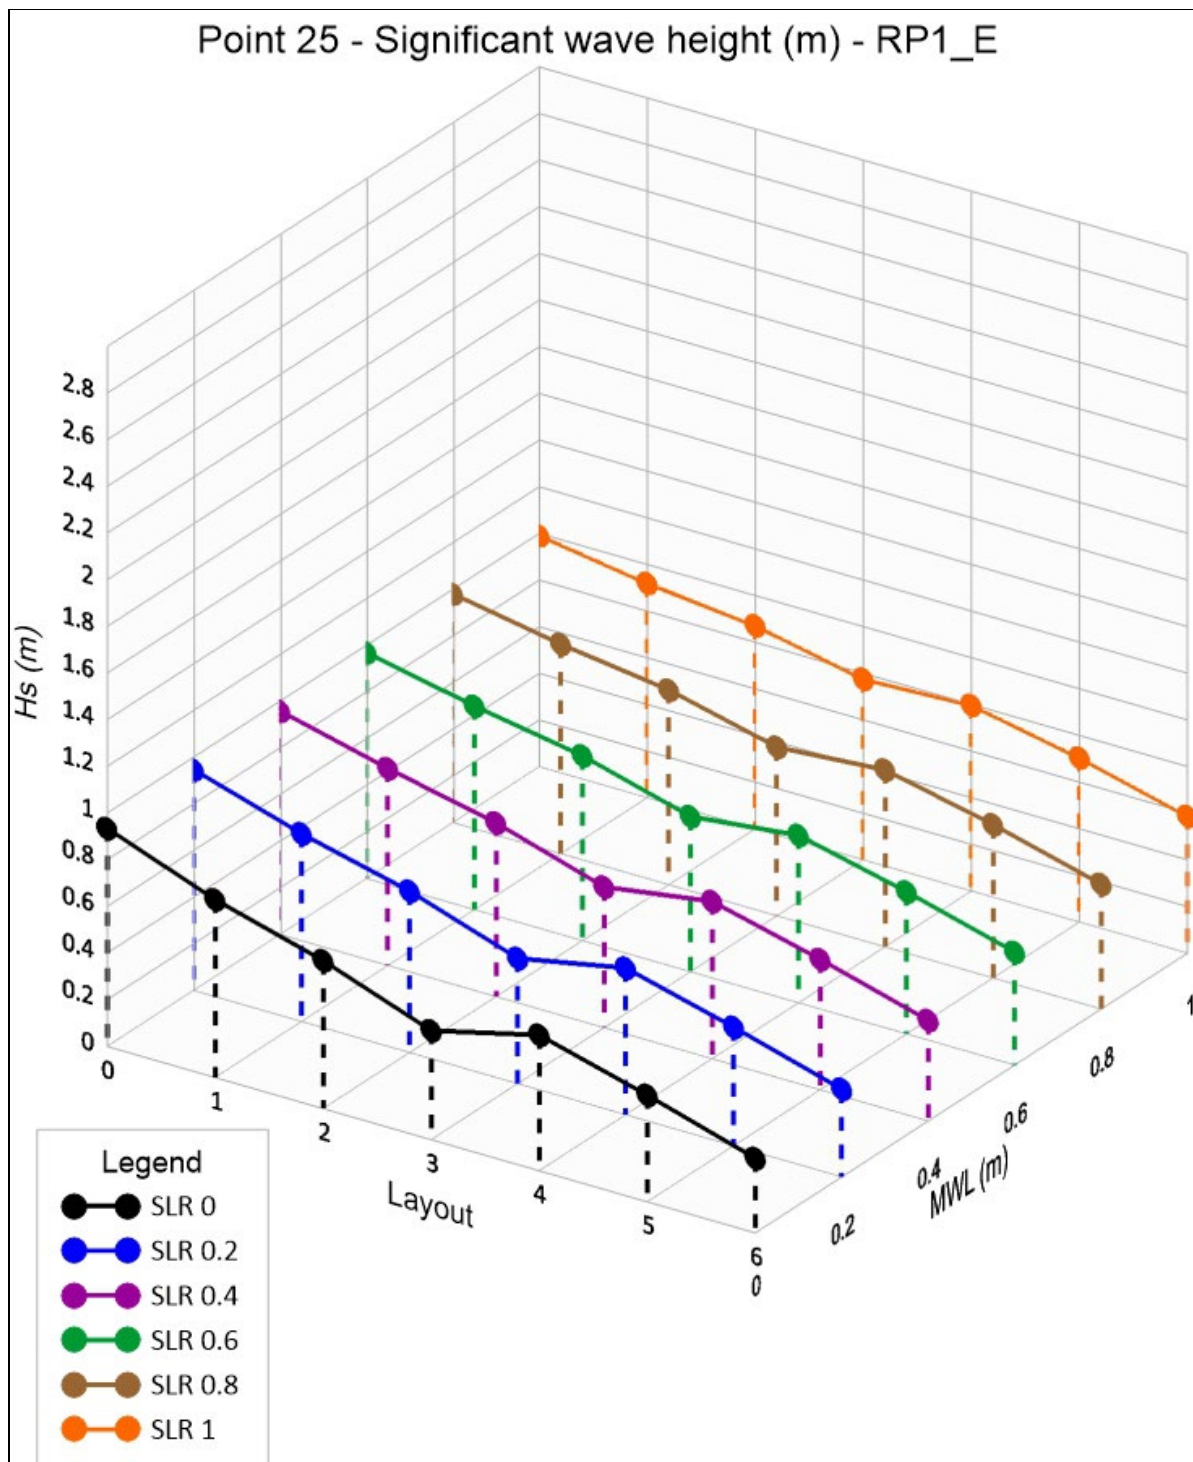

**Figure E4.1.** Significant wave heights in Point 25, for different layouts and RP1 storms from the eastern sector.

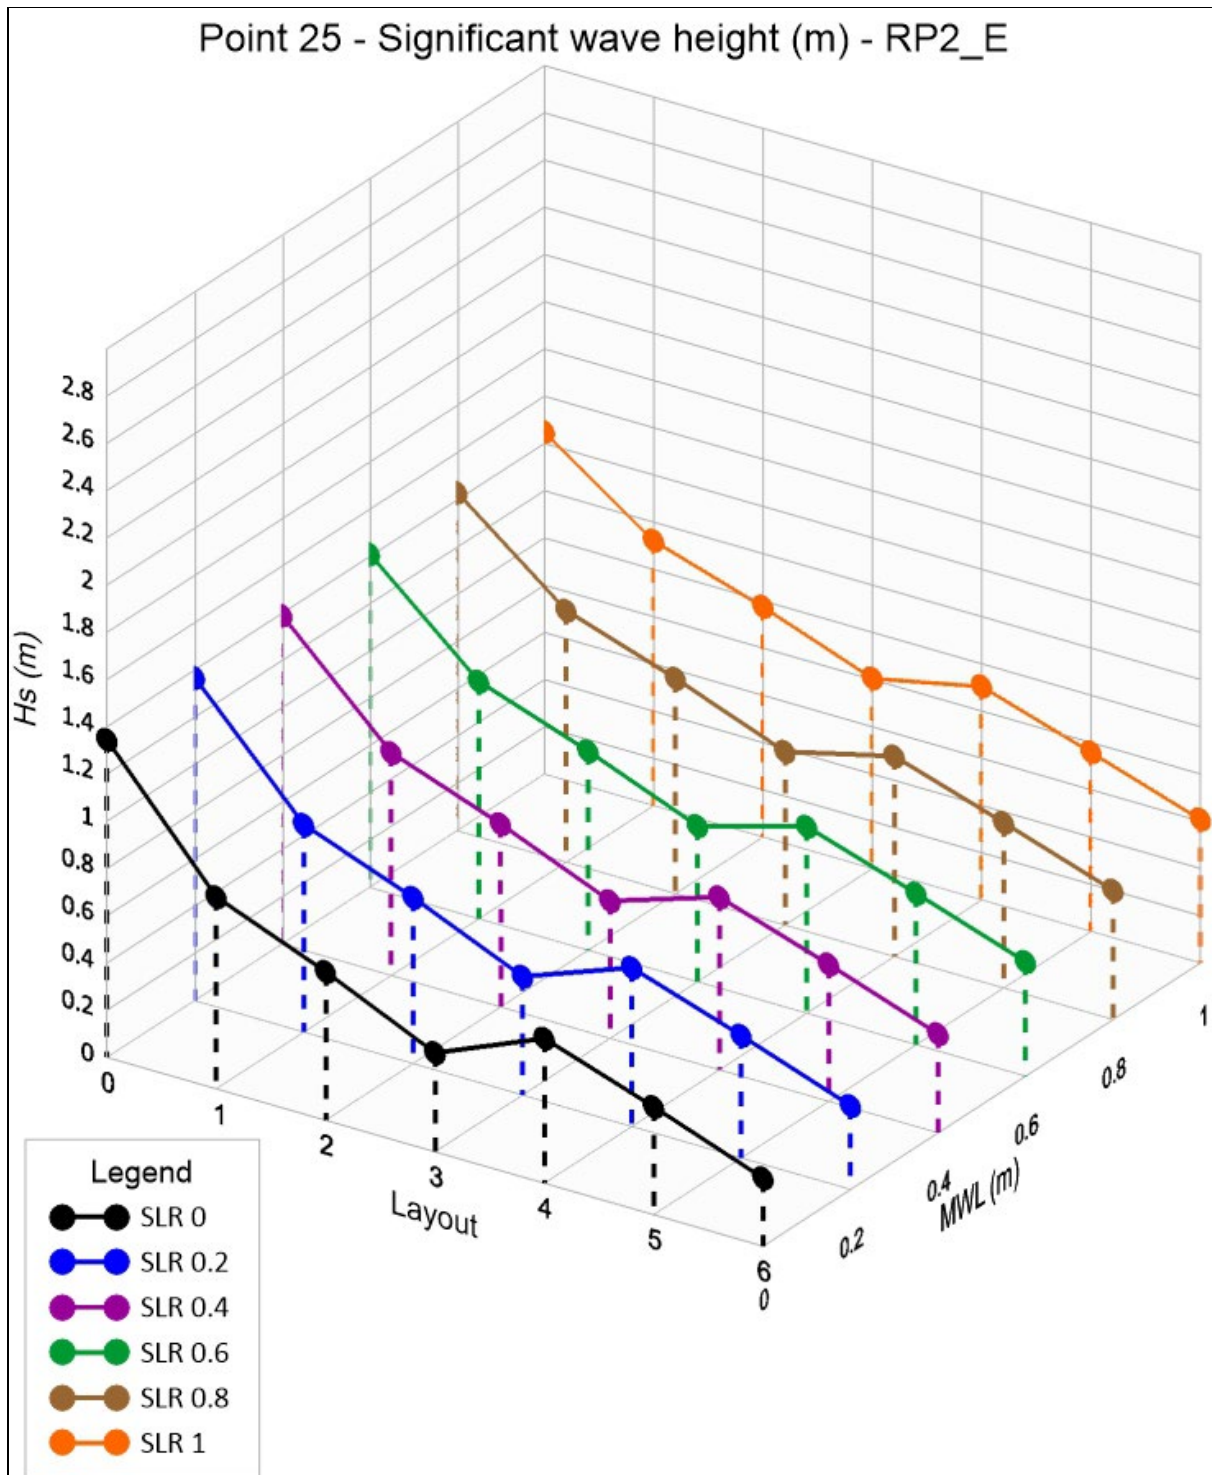

**Figure E4.2.** Significant wave heights in Point 25, for different layouts and RP2 storms from the eastern sector.

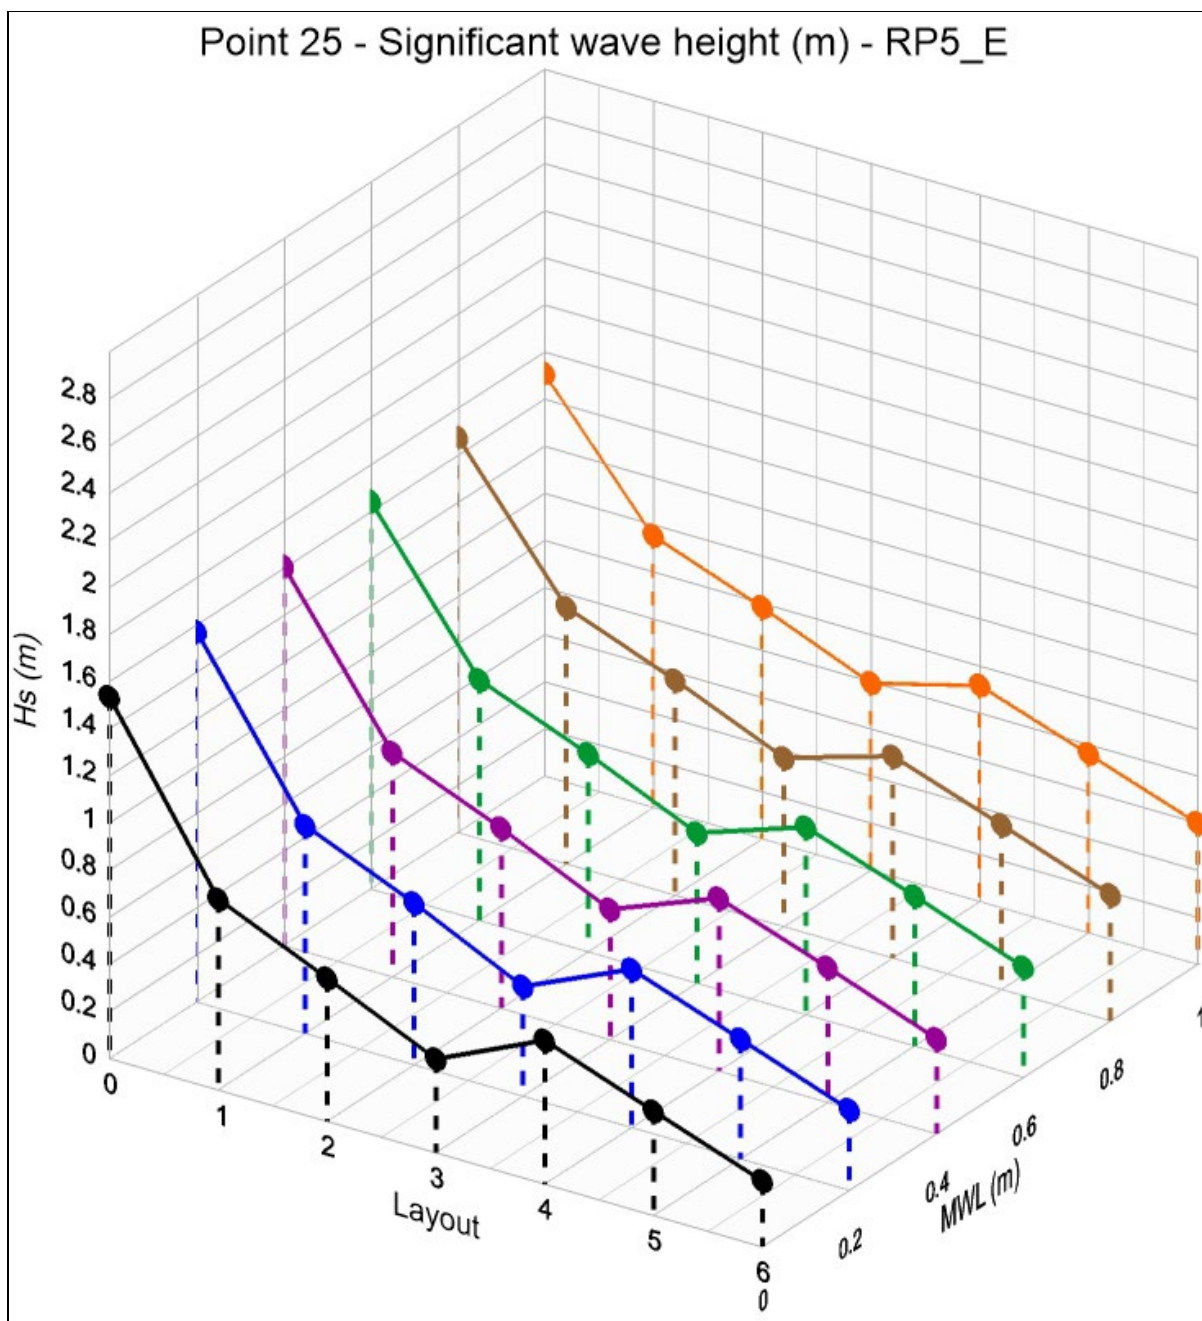

**Figure E4.3.** Significant wave heights in Point 25, for different layouts and RP5 storms from the eastern sector.

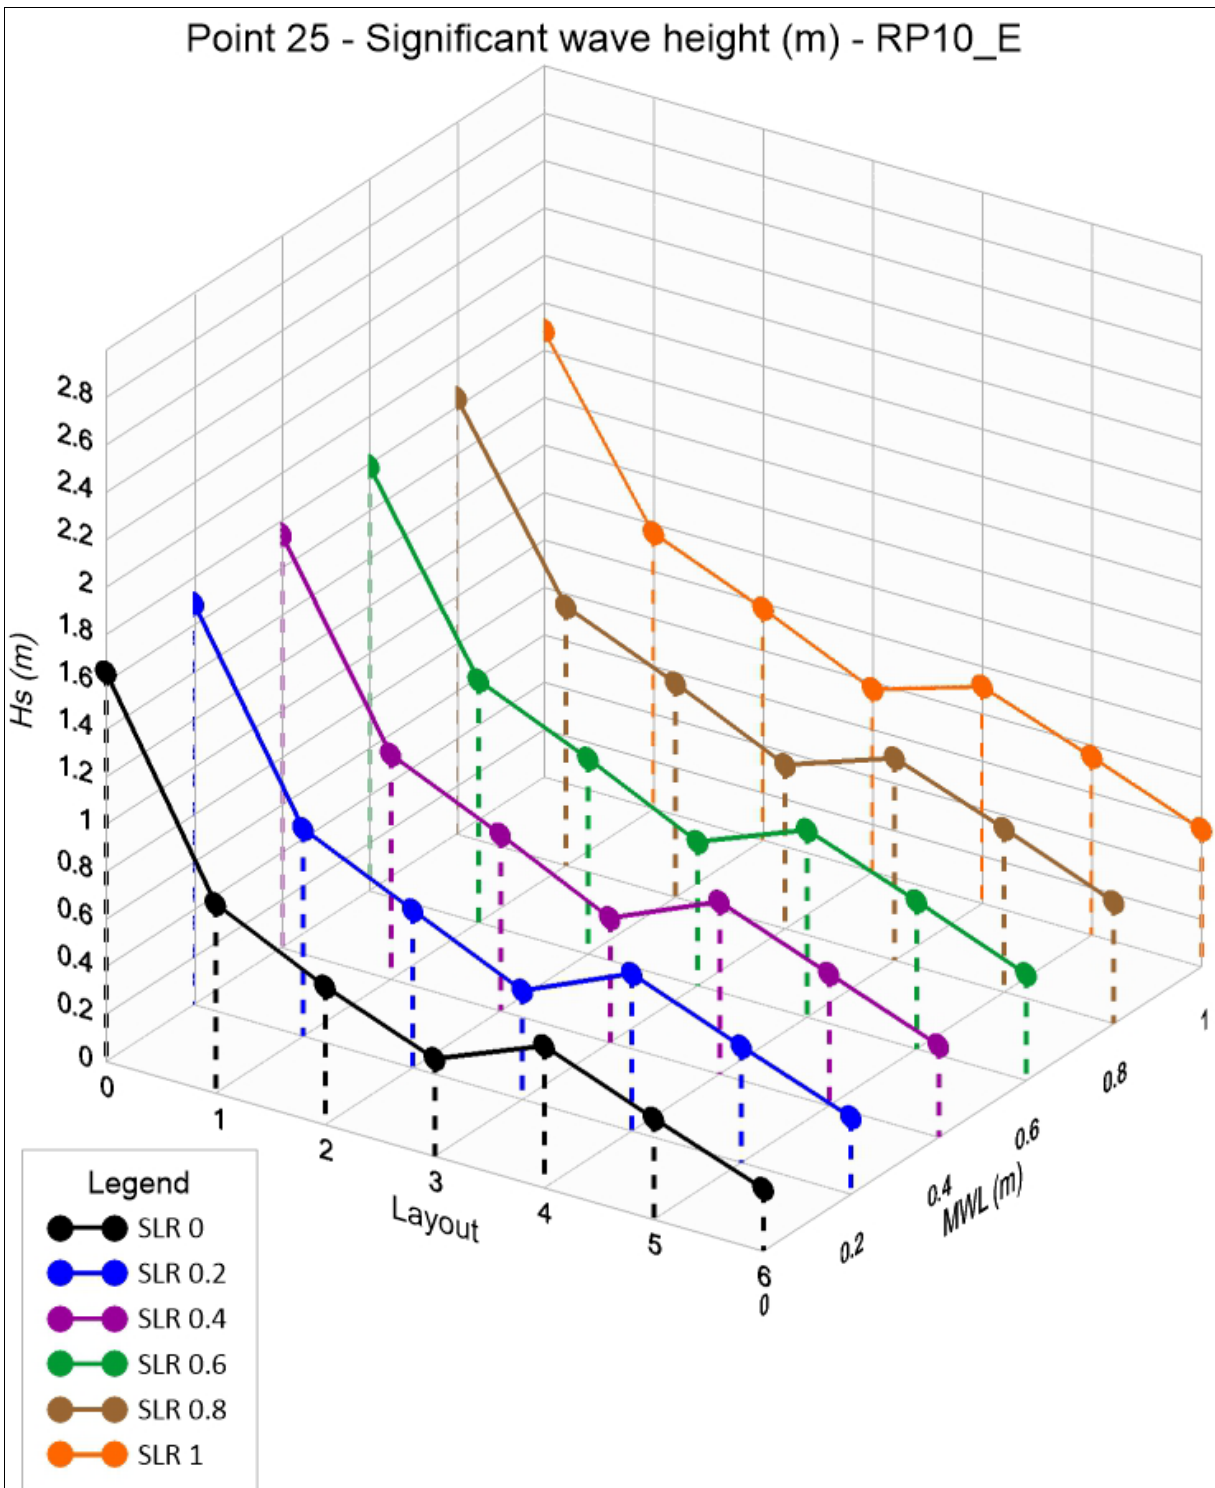

**Figure E4.4.** Significant wave heights in Point 25, for different layouts and RP10 storms from the eastern sector.



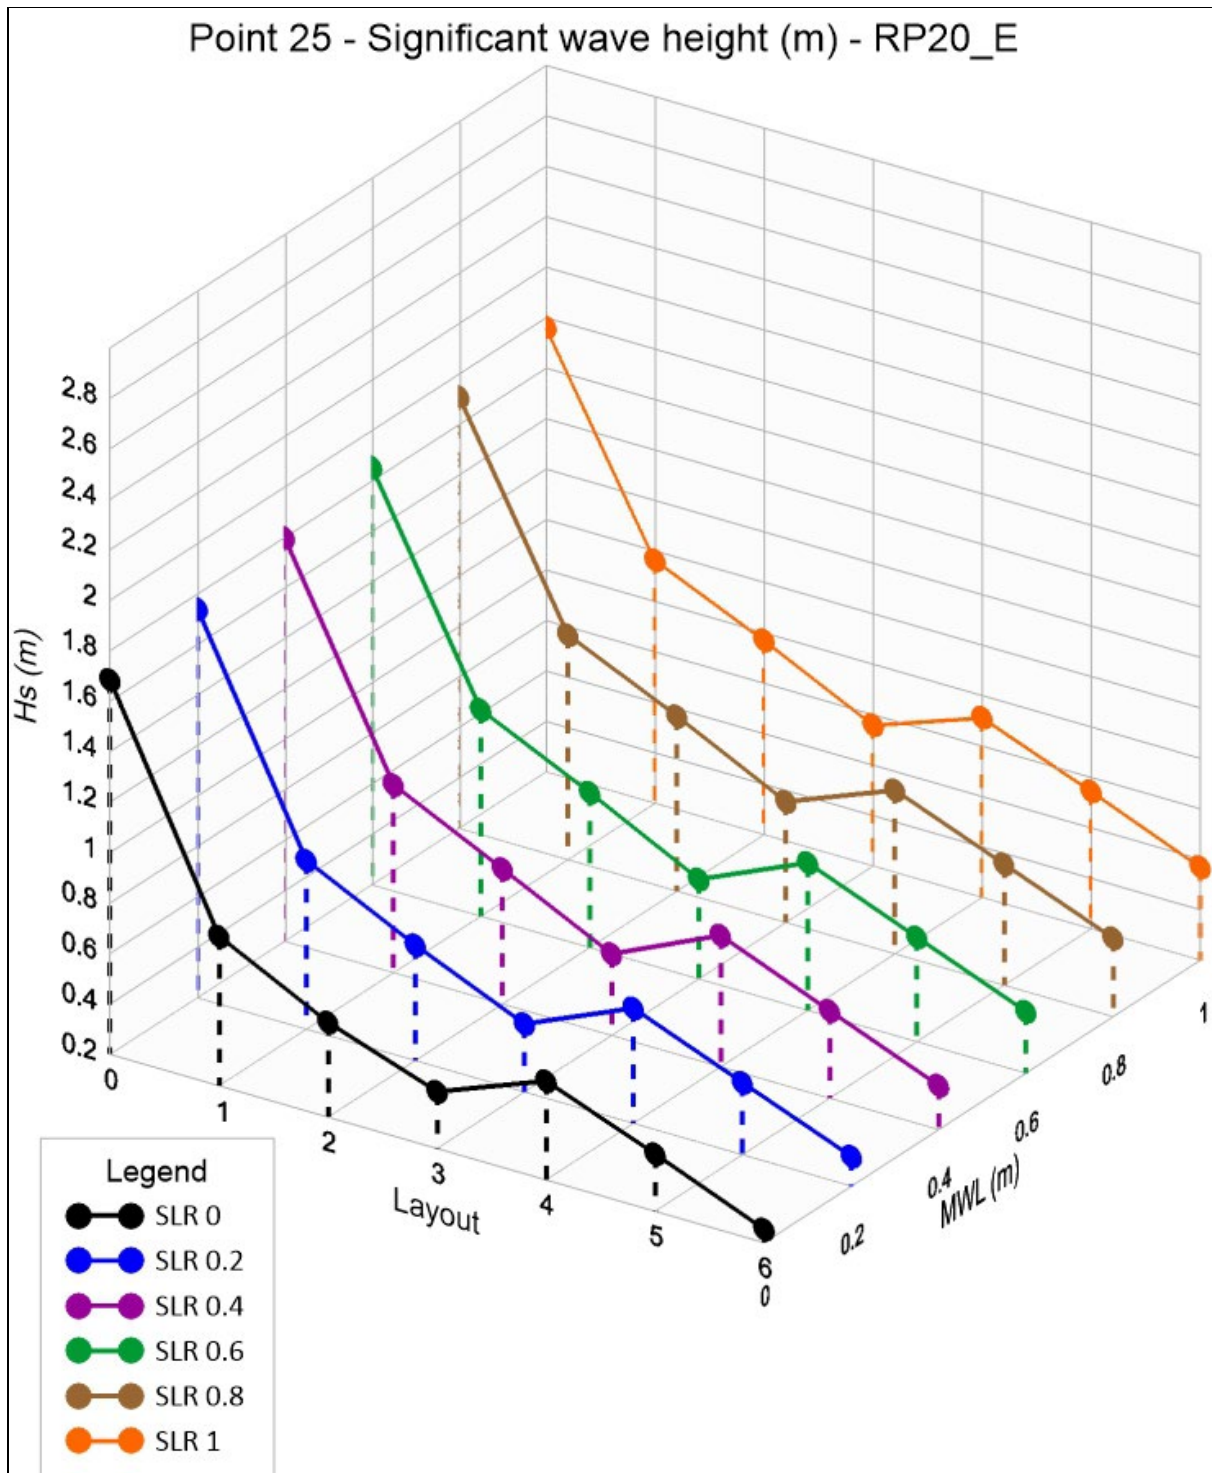

**Figure E4.5.** Significant wave heights in Point 25, for different layouts and RP20 storms from the eastern sector.

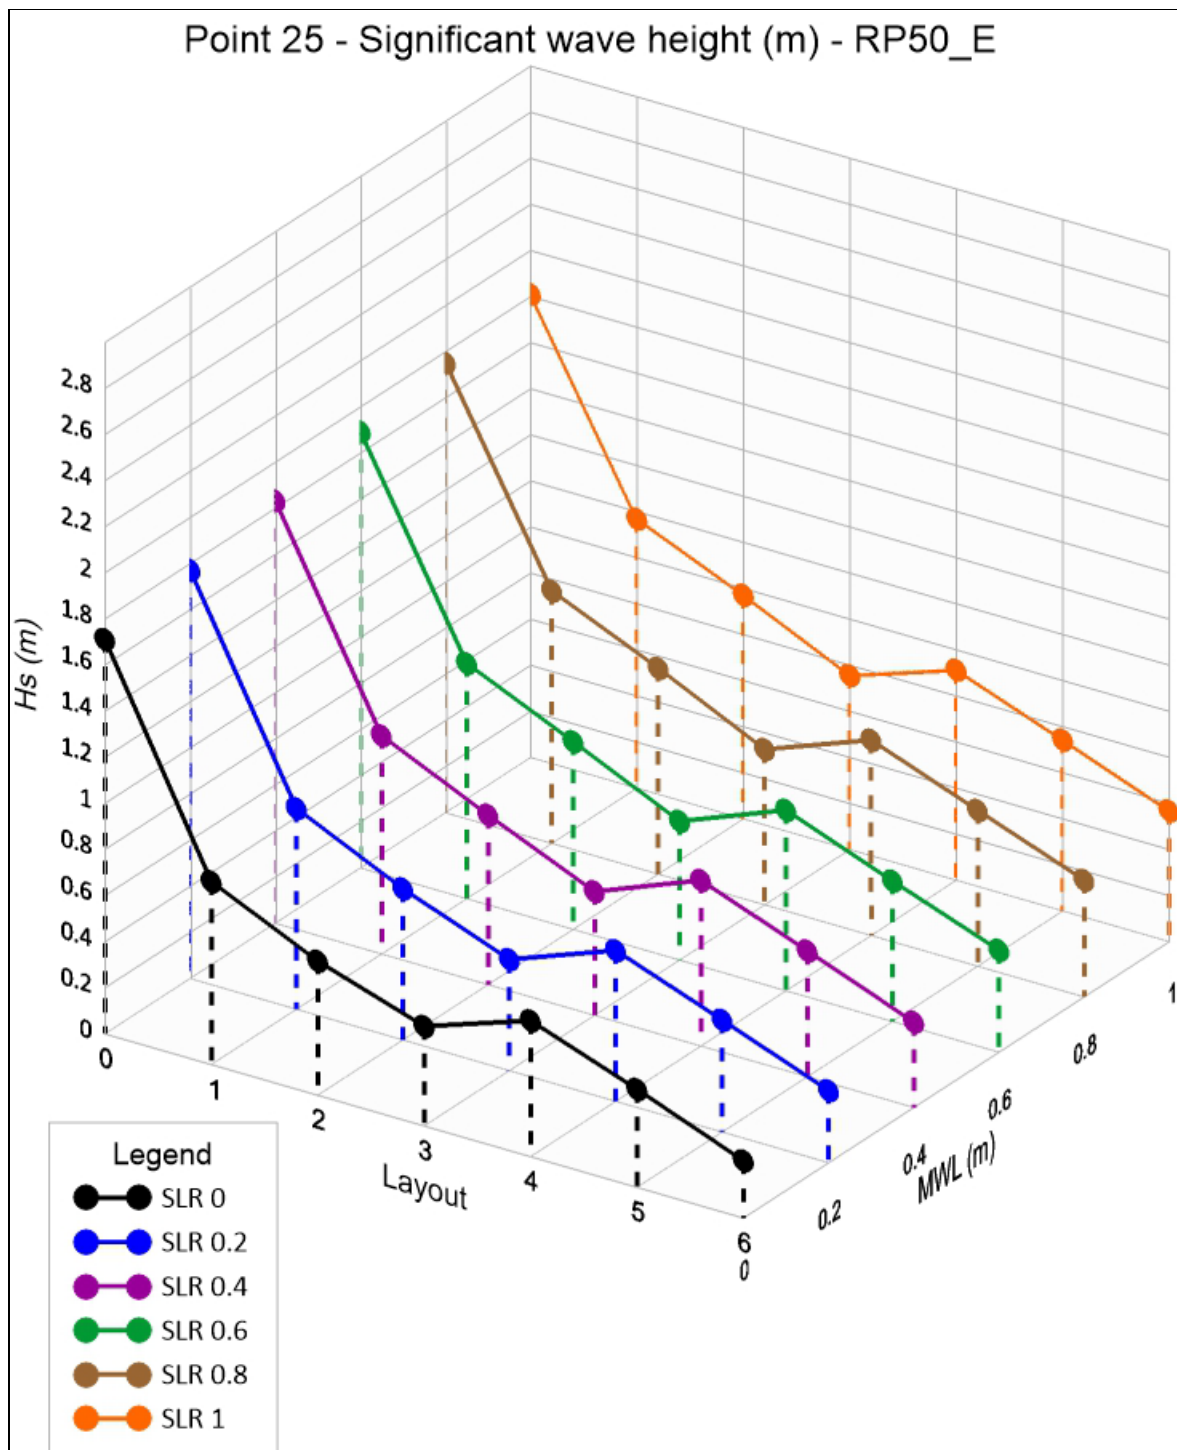

**Figure E4.6.** Significant wave heights in Point 25, for different layouts and RP50 storms from the eastern sector.

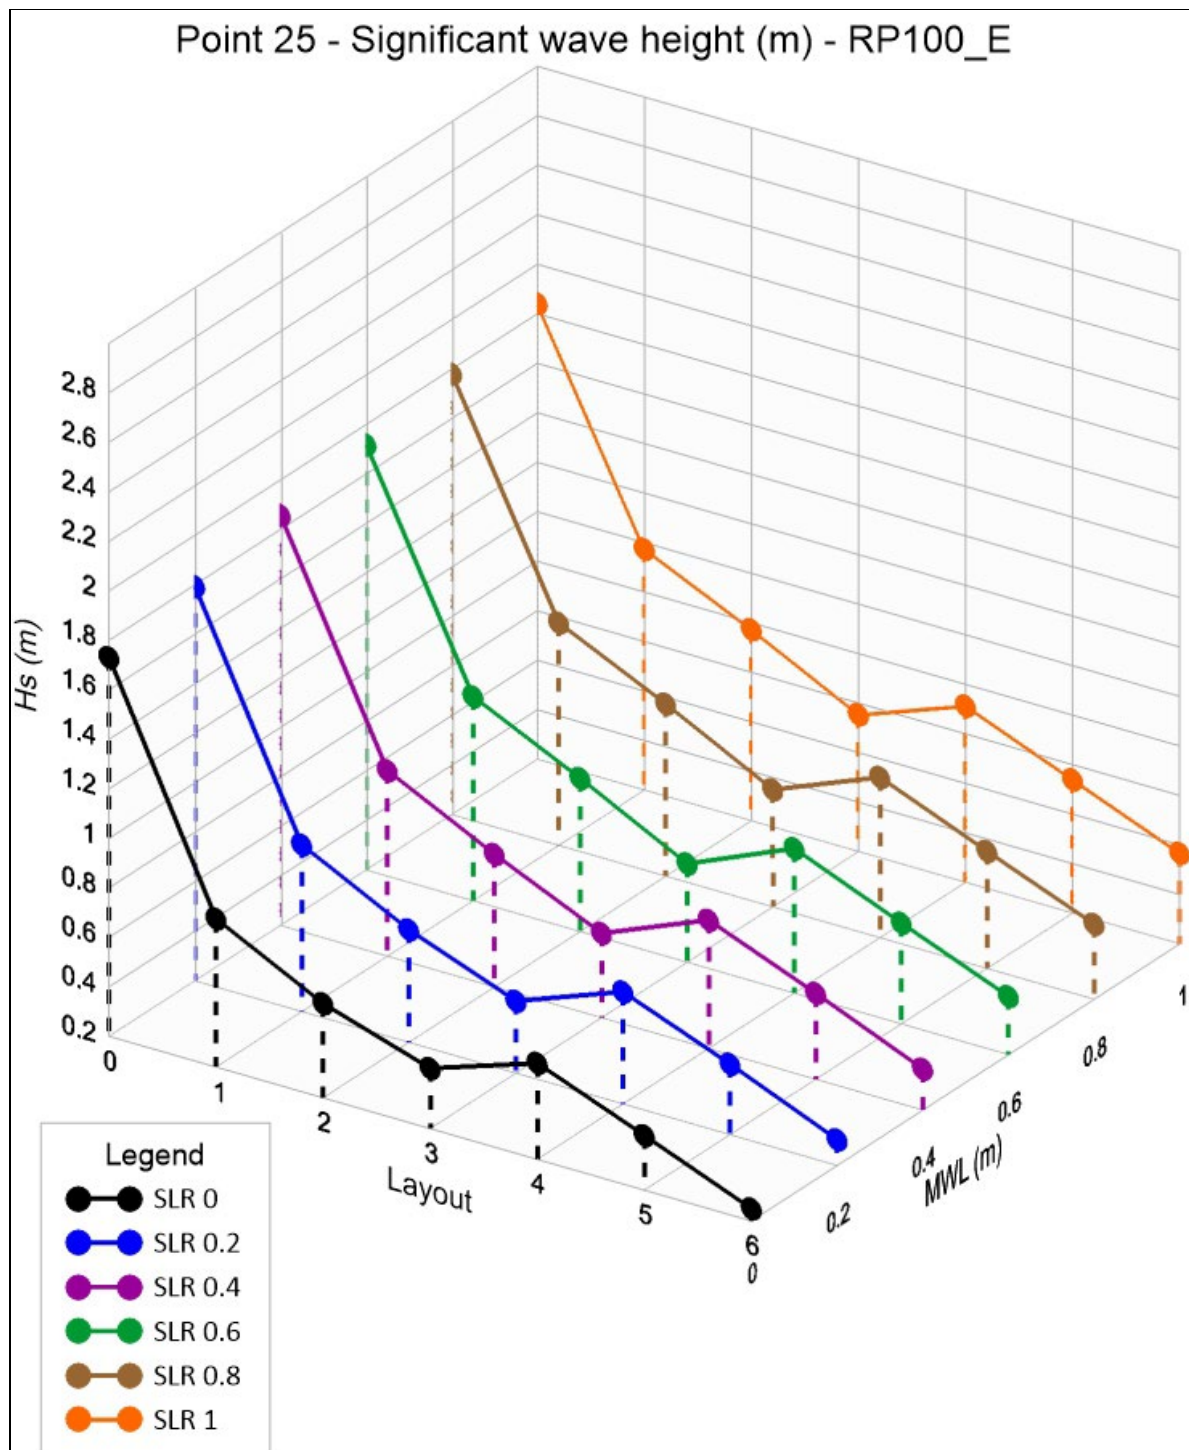

**Figure E4.7.** Significant wave heights in Point 25, for different layouts and RP100 storms from the eastern sector.
